# Supplementary material for: (-)-Sativan Inhibits Tumor Development and Regulates miR-200c/PD-L1 in Triple Negative Breast Cancer Cells
Source: PubMed Central journal article supplement (PMC7082844; doi:10.3389/fphar.2020.00251), 2020-03-13
Supplement: DataSheet_2.pdf [file DataSheet_2.pdf]

**(-)-Sativan inhibits tumor development and regulates  
miR-200c/PD-L1 in triple negative breast cancer cells**

Fu Peng<sup>1,2</sup>, Liang Xiong<sup>2</sup>, Cheng Peng<sup>2\*</sup>

1. *Key Laboratory of Drug-Targeting and Drug Delivery System of the Education Ministry and Sichuan Province, West China School of Pharmacy, Sichuan University, Chengdu, China.*
2. *Chengdu University of Traditional Chinese Medicine, Chengdu, China.*

Correspondence: Cheng Peng, Tel: +86-028-6180-0018, Fax: +86-028-6180-0018, Email:  
[pengchengchengdu@126.com](mailto:pengchengchengdu@126.com)

**Table S1. The primers used for Real-time PCR**

|              |                             |
|--------------|-----------------------------|
| <b>CD247</b> | (F) TGCCGACTACAAGCGAATTACTG |
|              | (R) CTGCTTGTCCAGATGACTTCGG  |
| <b>GAPDH</b> | (F) GACTCATGACCACAGTCCATGC  |
|              | (R) AGAGGCAGGGATGATGTTCTG   |
| <b>U6</b>    | (F) CTCGCTTCGGCAGCACA       |
|              | (R) AACGCTTCACGAATTTGCGT    |

**Table S2. The primers used for colony PCR**

|                            |                                                                      |
|----------------------------|----------------------------------------------------------------------|
| <b>CD247<br/>wide-type</b> | (F) CGCGCTCGAGGTTTGGGTCATGCTGGGGGA                                   |
|                            | (R) CGCGAAGCTTCTTTCTCCCTGTCACAGGCG                                   |
| <b>CD247<br/>mut</b>       | (F) ATTATCACTCTGGTCTATGACATTTGGAGGTCTGCTAATCCAGCATTG<br>GAACTTCTGATC |
|                            | (R) CATAGACCAGAGTGATAATAGTATATTAATTCATGGGAAG                         |

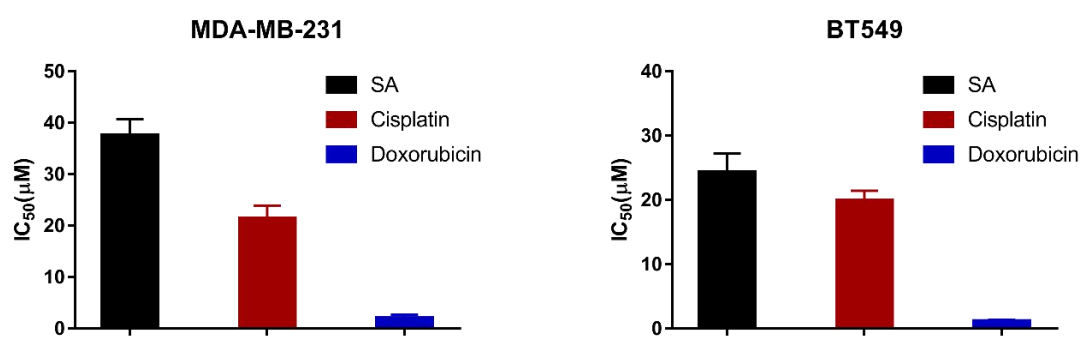

**Fig S1.** The IC<sub>50</sub> values of MDA-MB-231 and BT549 cells with the treatment of SA, cisplatin, and doxorubicin for 24 h.

## PhenomiR 2.0

| Study information    |                                 |
|----------------------|---------------------------------|
| Study design:        | Patient study phenotype-control |
| Patients:            | 55                              |
| Control:             | 55                              |
| Samples information: |                                 |
| Tissue/Cell line:    | <u>breast epithelium</u>        |
| Tissue comment:      |                                 |

## PhenomiR 2.0

| Study information    |                        |
|----------------------|------------------------|
| Study design:        | Cell culture study     |
| Patients:            |                        |
| Control:             |                        |
| Samples information: |                        |
| Tissue/Cell line:    | <u>MDA-MB-231 cell</u> |
| Tissue comment:      |                        |

### Detailed information about selected miRNA

|                  |                      |
|------------------|----------------------|
| miRNA:           | <u>hsa-mir-200c</u>  |
| miRNA comment:   |                      |
| Method:          | array CGH            |
| Further methods: |                      |
| Evidence:        | miRNA overexpression |
| Foldchange:      |                      |

### Detailed information about selected miRNA

|                  |                      |
|------------------|----------------------|
| miRNA:           | <u>hsa-mir-200c</u>  |
| miRNA comment:   |                      |
| Method:          | quantitative PCR     |
| Further methods: |                      |
| Evidence:        | miRNA downregulation |
| Foldchange:      | 5.882                |

**Fig S2.**PhenomiR 2.0 (<http://mips.helmholtz-muenchen.de/phenomir>) showed that miR-200c was highly expressed in normal breast epithelium, and was lowly expressed in TNBC cell line.

| hsa-miR-200c/CD247 Alignment                                                                       |                                                  |
|----------------------------------------------------------------------------------------------------|--------------------------------------------------|
| 3' agguaguaaugggcccGUCAUAAu 5' hsa-miR-200c<br>         <br>88:5' ucuucucagccacugaAGUAUUc 3' CD247 | mirSVR score: -0.0068<br>PhastCons score: 0.5456 |

**Fig S3.** MicroRNA.org (<http://www.microRNA.org/microRNA/getGeneForm.do>) predicted that CD247 was one of the most potential targets of miR-200c with the relatively high prediction scores.
